# Supplementary material
Source: MDPI journal article supplement (https://www.mdpi.com/2311-5637/9/9/786)
Supplement: s1 [file s1]

## Supplementary materials

**Table S1.** Results of simple descriptive test of winery fermentation in Riesling must (upscale)

| Sample*       | Look                | Odor/Smell                                   | Taste                        | Mouthfull           | Aftertaste           | Rankings |
|---------------|---------------------|----------------------------------------------|------------------------------|---------------------|----------------------|----------|
| EC1118        | Clear, clean yellow | Fresh, green paper, apple                    | Dry, fruity, acidic          | Medium body         | Light bitter, strong | 1        |
| SFE + EC1118  | Clear, clean yellow | Intensive, fresh, fruity, sweet              | Dry, slightly bitter, sweet  | Medium body, thick  | Bitter, strong       | 2        |
| TFL2          | Very bright yellow  | Less fruity, sweet, reserved                 | Very dry, bitter, less aroma | Flat, weak body     | Bitter, herbal       | 3        |
| TFL2 + EC1118 | Clear, clean yellow | Fresh, fruity, intensive                     | Dry, acidic, fruity          | Medium body         | Longlasting, strong  | 4        |
| SFE           | Clear, clean yellow | Sweet aromas lemon, citrus, medium intensity | Dry, sweet, high fruity      | Strong, medium body | Slightly bitter      | 5        |

\*All samples were fermented at the Hochschule Geisenheim University winery according to their standard protocol. Scale up was up to 20 L of fresh Riesling must in metal kegs. First 10 days were single fermentation and then 7 days were co-fermentation (sequential). Riesling must was supplemented with 0.4 g/L Optimum-White (inactivated yeast product; according to the supplier's instructions; Lallemant, Austria) and 0.3 g/L Vitaferm Ultra F3 (multi-nutrient complex containing nutrients such as amino acids, fatty acids, minerals, sterols, vitamins, etc; according to the producer; Erbsloh, Germany). Manual stirring was done twice a day and at the end of the fermentation the young wine was filtered and bottled. Blind descriptive tasting was performed by the panel of 18 people. The panel was tasked to describe the wine and rank it. EC1118: *Saccharomyces cerevisiae* wine strain, SFE: *Saccharomycopsis fermentans* wild type strain, TFL2: trifluoro-leucine resistant mutant strain.

**Table S2.** Amino acids measurements\*

|                        | EC1118 | SD   | SFE  | SD   | TFL1 | SD   | TFL2 | SD   | TFL3 | SD   | TFL4 | SD   | Riesling must |
|------------------------|--------|------|------|------|------|------|------|------|------|------|------|------|---------------|
| aspartic acid          | 0.5    | 0.25 | 0.8  | 0.05 | 1.6  | 0.14 | 4.7  | 0.16 | 1.5  | 0.50 | 1.7  | 0.04 | 27.2          |
| <b>threonine</b>       | 1.1    | 0.31 | 1.2  | 0.14 | 1.7  | 0.17 | 10.0 | 0.99 | 1.3  | 0.13 | 3.5  | 0.26 | 30.3          |
| <b>serine</b>          | 0.7    | 0.16 | 0.3  | 0.02 | 0.3  | 0.04 | 0.6  | 0.14 | 0.7  | 0.11 | 0.8  | 0.02 | 27.5          |
| asparagine             | 0.7    | 0.19 | 0.5  | 0.30 | 0.2  | 0.06 | 0.3  | 0.06 | 0.5  | 0.37 | 0.7  | 0.13 | 2.8           |
| glutamic acid          | 0.3    | 0.05 | 12.7 | 1.95 | 11.1 | 0.12 | 75.3 | 0.83 | 10.8 | 1.04 | 33.3 | 0.51 | 47.1          |
| <b>glutamine</b>       | 0.3    | 0.08 | 0.1  | 0.13 | 0.7  | 0.34 | 1.1  | 0.18 | 0.7  | 0.03 | 1.2  | 0.20 | <0.1          |
| <b>glycine</b>         | 0.7    | 0.04 | 1.2  | 0.04 | 1.9  | 0.04 | 5.8  | 0.17 | 1.9  | 0.03 | 2.2  | 0.11 | 2.4           |
| <b>alanine</b>         | 6.2    | 0.97 | 2.6  | 0.05 | 5.4  | 0.40 | 2.6  | 0.22 | 5.1  | 0.19 | 4.1  | 0.26 | 77.3          |
| citrulline             | <0.1   | -    | <0.1 | -    | <0.1 | -    | <0.1 | -    | <0.1 | -    | <0.1 | -    | <0.1          |
| <b>valine</b>          | 0.2    | 0.07 | 1.6  | 0.40 | <0.1 | -    | 0.2  | 0.07 | 0.1  | 0.06 | 1.5  | 0.30 | 9.2           |
| cystine                | 1.9    | 0.09 | 0.3  | 0.06 | 0.7  | 0.17 | 0.7  | 0.02 | 0.9  | 0.14 | 0.5  | 0.01 | 0.2           |
| <b>methionine</b>      | 0.2    | 0.04 | 0.1  | 0.03 | 0.4  | 0.18 | 0.3  | 0.12 | 0.2  | 0.08 | 0.8  | 1.09 | 0.9           |
| <b>isoleucine</b>      | 0.3    | 0.12 | 0.5  | 0.14 | 0.6  | 0.15 | 2.2  | 0.39 | 0.4  | 0.18 | 0.7  | 0.07 | 4.9           |
| <b>leucine</b>         | 0.4    | 0.07 | 0.4  | 0.07 | 3.2  | 0.04 | 3.2  | 0.17 | 2.8  | 0.06 | 2.9  | 0.06 | 7.2           |
| <b>tyrosine</b>        | 0.2    | 0.06 | 0.1  | 0.09 | 0.1  | 0.10 | 3.2  | 0.21 | 0.1  | 0.05 | 0.6  | 0.37 | 3.9           |
| <b>phenylalanine</b>   | 0.3    | 0.07 | 2.1  | 0.09 | 1.5  | 0.24 | 7.7  | 0.55 | 0.4  | 0.09 | 2.3  | 1.32 | 6.6           |
| β-alanine              | 0.3    | 0.22 | 1.0  | 0.07 | 1.7  | 0.30 | 1.4  | 0.91 | 1.5  | 0.17 | 1.4  | 0.24 | 1.8           |
| β-aminoisobutyric acid | 0.2    | 0.15 | <0.1 | -    | <0.1 | -    | <0.1 | -    | 0.1  | 0.17 | 0.5  | 0.85 | <0.1          |



|                |        |               |       |            |       |               |      |             |       |             |       |             |      |                 |      |
|----------------|--------|---------------|-------|------------|-------|---------------|------|-------------|-------|-------------|-------|-------------|------|-----------------|------|
| EC1118         |        |               |       |            |       |               |      |             |       |             |       |             |      |                 |      |
| SFE            |        | 3.5           | 0.08  | <0.1       | -     | 50.8          | 3.09 | <0.1        | -     | 0.3         | -     | 0.2         | 0.01 | 80              | 3.54 |
| TFL1           |        | 3.6           | 0.07  | 0.8        | 0.01  | 40.4          | 1.22 | <0.1        | -     | 0.1         | <0.01 | 0.2         | 0.01 | 71              | 16.4 |
| TFL2           |        | 3.3           | 0.11  | <0.1       | -     | 51            | 0.84 | <0.1        | -     | <0.1        | -     | 0.2         | 0.01 | 289             | 12.5 |
| TFL3           |        | 3.5           | 0.12  | <0.1       | -     | 49.1          | 5.05 | <0.1        | -     | <0.1        | -     | 0.2         | 0.02 | 253             | 5.11 |
| TFL4           |        | 3.5           | 0.18  | 0.6        | -     | 51.2          | 2.46 | <0.1        | -     | 0.2         | -     | 0.2         | 0.01 | 206             | 19.6 |
| Must           |        | 3.3           | -     | 3.8        | -     | 52.9          |      | <0.1        | -     | <0.1        | -     | 0.2         | -    | nd              | -    |
| Müller-Thurgau | Strain | Tartaric acid |       | Malic acid |       | Shikimic acid |      | Lactic acid |       | Acetic acid |       | Citric acid |      | Isovaleric acid |      |
|                |        | [g/L]         |       | [g/L]      |       | [mg/L]        |      | [g/L]       |       | [g/L]       |       | [g/L]       |      | [mg/L]          |      |
|                |        | SF            | SD    | SF         | SD    | SF            | SD   | SF          | SD    | SF          | SD    | SF          | SD   | SF              | SD   |
|                | EC1118 | 4.4           | 0.17  | 1.8        | 0.03  | 25            | 0.19 | 0.16        | 0.01  | 0.36        | 0.01  | <0.1        | -    | 5               | 0.23 |
|                | SFE    | 5.4           | 0.05  | 1.6        | 0.09  | 16            | 6.84 | 0.48        | 0.03  | <0.1        | -     | <0.1        | -    | 3               | 0.18 |
|                | TFL1   | 5.5           | <0.01 | 1.3        | <0.01 | 26            | 0.17 | 0.44        | 0.10  | <0.1        | -     | <0.1        | -    | 11              | 0.94 |
|                | TFL2   | 5.4           | 0.40  | 1.1        | 0.05  | 25            | 2.34 | <0.1        |       | 0.36        | 0.04  | <0.1        | -    | 20              | 0.88 |
|                | TFL3   | 5.4           | 0.06  | 1.3        | 0.02  | 25            | 0.88 | 0.69        | <0.01 | <0.1        | -     | <0.1        | -    | 8               | 0.39 |
|                | TFL4   | 5.3           | 0.10  | 1.3        | 0.03  | 25            | 0.84 | 0.4         | 0.01  | <0.1        | -     | <0.1        | -    | 10              | 0.35 |
|                | Must   | 5.6           | -     | 1.6        | -     | 28            | -    | <0.1        | -     | <0.1        | -     | <0.1        | -    | nd              | -    |
|                |        | CF            | SD    | CF         | SD    | CF            | SD   | CF          | SD    | CF          | SD    | CF          | SD   | CF              | SD   |
|                | EC1118 |               |       |            |       |               |      |             |       |             |       |             |      |                 |      |
|                | SFE    | 5.1           | 0.10  | 1.5        | 0.07  | 13.4          | 1.39 | 0.3         | 0.09  | 0.1         | 0.13  | 0.1         | 0.01 | 9               | 0.41 |
|                | TFL1   | 5.2           | 0.14  | 1.2        | 0.08  | 15.1          | 0.23 | 0.3         | 0.02  | 0.4         | 0.13  | 0.1         | 0.01 | 19              | 0.84 |
|                | TFL2   | 5.1           | 0.24  | 1.2        | 0.17  | 6.7           | 0.98 | 0.2         | 0.03  | 0.1         | 0.13  | <0.1        | -    | 21              | 0.85 |
|                | TFL3   | 5.1           | 0.08  | 1.6        | 0.03  | 14.2          | 0.48 | 0.4         | 0.04  | 0.2         | 0.13  | 0.1         | -    | 14              | 1.03 |
|                | TFL4   | 5.1           | 0.62  | 1.5        | 0.06  | 14.8          | 0.60 | 0.4         | 0.11  | 0.1         | 0.13  | 0.1         | 0.01 | 19              | 2.04 |
|                | Must   | 5             | -     | 1.6        | -     | 26            | -    | <0.1        | -     | <0.1        | -     | <0.1        | -    | nd              | -    |

\*This table contains information on HPLC results of measured acid concentration generated during the fermentation of three grape varieties: Riesling, Chardonnay and Müller-Thurgau at both single fermentation (SF) and co-fermentation (CF) processes. SD: Standard Deviation, calculated for triplicate samples; \*\* Isovaleric acid was measured by GC-MS; nd: not detected.
